# Supplementary material for: Spontaneous Symmetry Breaking: The Case of Crazy Clock and Beyond
Source: MDPI journal article supplement (doi:10.3390/sym14020413), 2022-02-19
Supplement: s1 [file s1]

## Supplementary Material

### Spontaneous Symmetry Breaking: The Case of Crazy Clock and Beyond

Maja C. Pagnacco<sup>1\*</sup>, Jelena P. Maksimović<sup>2</sup>, Marko Daković<sup>2</sup>, Bojana Bokić<sup>3</sup>, Sébastien R. Mouchet<sup>4a,5</sup>, Thierry Verbiest<sup>6</sup>, Yves Caudano<sup>4a,4b</sup> and Branko Kolarić<sup>3,7\*</sup>

University of Belgrade, Institute of Chemistry, Technology and Metallurgy, Center for Catalysis and Chemical Engineering, Njegoševa 12, Belgrade, Serbia;  
[maja.pagnacco@nanosys.ihtm.bg.ac.rs](mailto:maja.pagnacco@nanosys.ihtm.bg.ac.rs) or [maja.milenkovic@gmail.com](mailto:maja.milenkovic@gmail.com)

<sup>2</sup> University of Belgrade, Faculty of Physical Chemistry, Studentski Trg 12, Belgrade, Serbia;  
[jelena.maksimovic@ffh.bg.ac.rs](mailto:jelena.maksimovic@ffh.bg.ac.rs) and [marko@ffh.bg.ac.rs](mailto:marko@ffh.bg.ac.rs)

<sup>3</sup> Center for Photonics, Institute of Physics, University of Belgrade, Pregrevica 118, 11080 Belgrade, Serbia; [bojana@ipb.ac.rs](mailto:bojana@ipb.ac.rs)

<sup>4a</sup> Department of Physics & Namur Institute of Structured Matter (NISM), University of Namur, Rue de Bruxelles 61, 5000 Namur, Belgium; <sup>4b</sup> also Namur Institute for Complex Systems (naXys); [yves.caudano@unamur.be](mailto:yves.caudano@unamur.be)

<sup>5</sup> School of Physics, University of Exeter, Stocker Road, Exeter EX4 4QL, UK;  
[sebastien.mouchet@unamur.be](mailto:sebastien.mouchet@unamur.be)

<sup>6</sup> Molecular Imaging and Photonics, Department of Chemistry, KU Leuven, Heverlee, Belgium;  
[thierry.verbiest@fys.kuleuven.be](mailto:thierry.verbiest@fys.kuleuven.be)

<sup>7</sup> Micro- and Nanophotonic Materials Group, University of Mons, Place du Parc 20, 7000 Mons, Belgium; [branko.kolaric@umons.ac.be](mailto:branko.kolaric@umons.ac.be)

\* Correspondence: [maja.pagnacco@nanosys.ihtm.bg.ac.rs](mailto:maja.pagnacco@nanosys.ihtm.bg.ac.rs) or [maja.milenkovic@gmail.com](mailto:maja.milenkovic@gmail.com) and [branko.kolaric@umons.ac.be](mailto:branko.kolaric@umons.ac.be)

**Table S1.** The Briggs-Rauscher oscillogram duration ( $\tau_{osc}$ ), the numbers of oscillations, and state I to state II transition time ( $\tau^*$ ) when no-mixing conditions is applied:  $[\text{Malonic acid}]_0 = 0.0789 \text{ M}$ ,  $[\text{MnSO}_4]_0 = 0.00752 \text{ M}$ ,  $[\text{HClO}_4]_0 = 0.03 \text{ M}$ ,  $[\text{KIO}_3]_0 = 0.0752 \text{ M}$ ,  $[\text{H}_2\text{O}_2]_0 = 1.176 \text{ M}$ ,  $T = 37.0^\circ\text{C}$ , reaction volume 25 ml.

| Experiment Number # | $\tau_{osc} / \text{min}$ | Number of oscillations | $\tau^* / \text{min}$ |
|---------------------|---------------------------|------------------------|-----------------------|
| 1                   | 1.68                      | 35                     | 5.0                   |
| 2                   | 1.75                      | 36                     | 14.77                 |
| 3                   | 1.62                      | 34                     | 2.73                  |
| 4                   | 1.73                      | 35                     | 2.76                  |
| 5                   | 1.71                      | 36                     | 0.66                  |
| 6                   | 1.79                      | 37                     | 0.19                  |
| 7                   | 1.63                      | 34                     | 5.58                  |
| 8                   | 1.77                      | 36                     | 46.95                 |
| 9                   | 1.49                      | 33                     | 11.92                 |

|                                                         |                    |                   |               |
|---------------------------------------------------------|--------------------|-------------------|---------------|
| 10                                                      | 1.80               | 36                | 3.37          |
| 11                                                      | 1.70               | 36                | 3.65          |
| 12                                                      | 1.71               | 36                | 19.05         |
| 13                                                      | 1.69               | 35                | 10.10         |
| 14                                                      | 1.57               | 33                | 20.20         |
| 15                                                      | 1.57               | 33                | 6.31          |
| 16                                                      | 1.69               | 36                | 11.47         |
| 17                                                      | 1.72               | 36                | 2.83          |
| 18                                                      | 1.71               | 35                | 19.05         |
| 19                                                      | 1.75               | 35                | 18.54         |
| 20                                                      | 1.57               | 34                | 1.77          |
| 21                                                      | 1.66               | 36                | 36.34         |
| 22                                                      | 1.69               | 36                | 22.06         |
| 23                                                      | 1.67               | 35                | 2.78          |
| 24                                                      | 1.61               | 36                | 2.94          |
| 25                                                      | 1.69               | 36                | 17.82         |
| 26                                                      | 1.65               | 36                | 19.83         |
| 27                                                      | 1.72               | 36                | 16.40         |
| 28                                                      | 1.71               | 35                | 13.35         |
| 29                                                      | 1.80               | 36                | 1.93          |
| 30                                                      | 1.55               | 36                | 19.65         |
| <b>Mean value<br/>with 95%<br/>confidence<br/>limit</b> | <b>1.68 ± 0.03</b> | <b>35.3 ± 0.4</b> | <b>12 ± 4</b> |

**Table S2.** The Briggs-Rauscher oscillogram duration ( $\tau_{osc}$ ), the numbers of oscillations, and state I to state II transition time ( $\tau^*$ ) when 100 rpm mixing conditions is applied:  $[\text{Malonic acid}]_0 = 0.0789 \text{ M}$ ,  $[\text{MnSO}_4]_0 = 0.00752 \text{ M}$ ,  $[\text{HClO}_4]_0 = 0.03 \text{ M}$ ,  $[\text{KIO}_3]_0 = 0.0752 \text{ M}$ ,  $[\text{H}_2\text{O}_2]_0 = 1.176 \text{ M}$ ,  $T = 37.0^\circ\text{C}$ , reaction volume 25 ml.

| Experiment Number<br># | $\tau_{osc} / \text{min}$ | Number of<br>oscillations | $\tau^* / \text{min}$ |
|------------------------|---------------------------|---------------------------|-----------------------|
| 1                      | 1.68                      | 36                        | 27.38                 |
| 2                      | 1.54                      | 34                        | 27.83                 |
| 3                      | 1.62                      | 36                        | 1.18                  |
| 4                      | 1.60                      | 35                        | 6.36                  |
| 5                      | 1.54                      | 34                        | 6.74                  |
| 6                      | 1.55                      | 34                        | 12.35                 |
| 7                      | 1.74                      | 36                        | 8.25                  |
| 8                      | 1.73                      | 36                        | 7.68                  |
| 9                      | 1.61                      | 35                        | 6.38                  |
| 10                     | 1.65                      | 35                        | 2.43                  |
| 11                     | 1.74                      | 36                        | 21.82                 |
| 12                     | 1.58                      | 35                        | 22.58                 |
| 13                     | 1.67                      | 36                        | 25.23                 |
| 14                     | 1.64                      | 36                        | 37.52                 |
| 15                     | 1.60                      | 35                        | 14.42                 |
| 16                     | 1.76                      | 36                        | 2.73                  |
| 17                     | 1.70                      | 35                        | 12.53                 |
| 18                     | 1.73                      | 35                        | 3.07                  |
| 19                     | 1.68                      | 35                        | 1.00                  |
| 20                     | 1.73                      | 35                        | 1.28                  |

|                                                     |                    |                   |               |
|-----------------------------------------------------|--------------------|-------------------|---------------|
| 21                                                  | 1.74               | 36                | 38.35         |
| 22                                                  | 1.75               | 35                | 22.31         |
| 23                                                  | 1.76               | 36                | 1.35          |
| 24                                                  | 1.69               | 35                | 37.47         |
| 25                                                  | 1.67               | 35                | 39.92         |
| 26                                                  | 1.77               | 36                | 30.03         |
| 27                                                  | 1.70               | 35                | 32.15         |
| 28                                                  | 1.60               | 34                | 15.28         |
| 29                                                  | 1.63               | 35                | 27.35         |
| 30                                                  | 1.52               | 35                | 28.68         |
| <b>Mean value with<br/>95% confidence<br/>limit</b> |                    |                   |               |
|                                                     | <b>1.66 ± 0.03</b> | <b>35.2 ± 0.3</b> | <b>17 ± 5</b> |
